# Supplementary material for: Drought Stress Responses in Context-Specific Genome-Scale Metabolic Models of Arabidopsis thaliana
Source: MDPI journal article supplement (doi:10.3390/metabo10040159), 2020-04-18
Supplement: s1 [file s1]

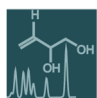

Supplementary Figures

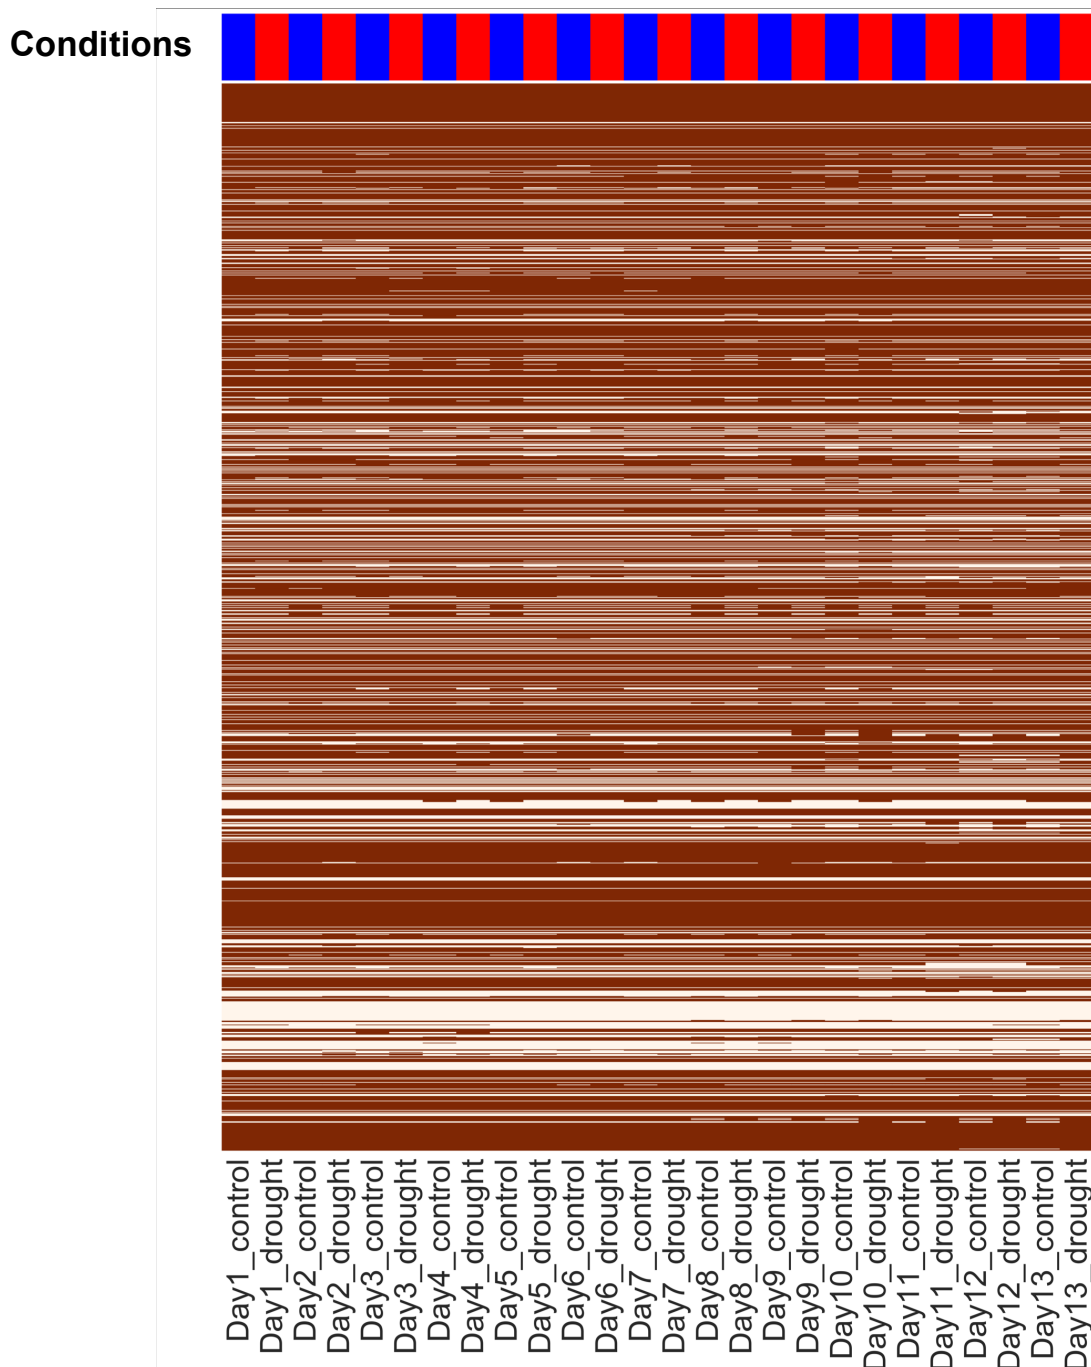

**Figure S1.** Heatmap depicting present or absent reactions in 26 context-specific GEMs. The rows represent 1601 reactions in the global GEM (Supplementary data 1, AraGEMconstraintFree.xls). The color indicates presence (brown) or absence (white) in each context-specific GEM. Conditions indicate control (blue) or drought (red).

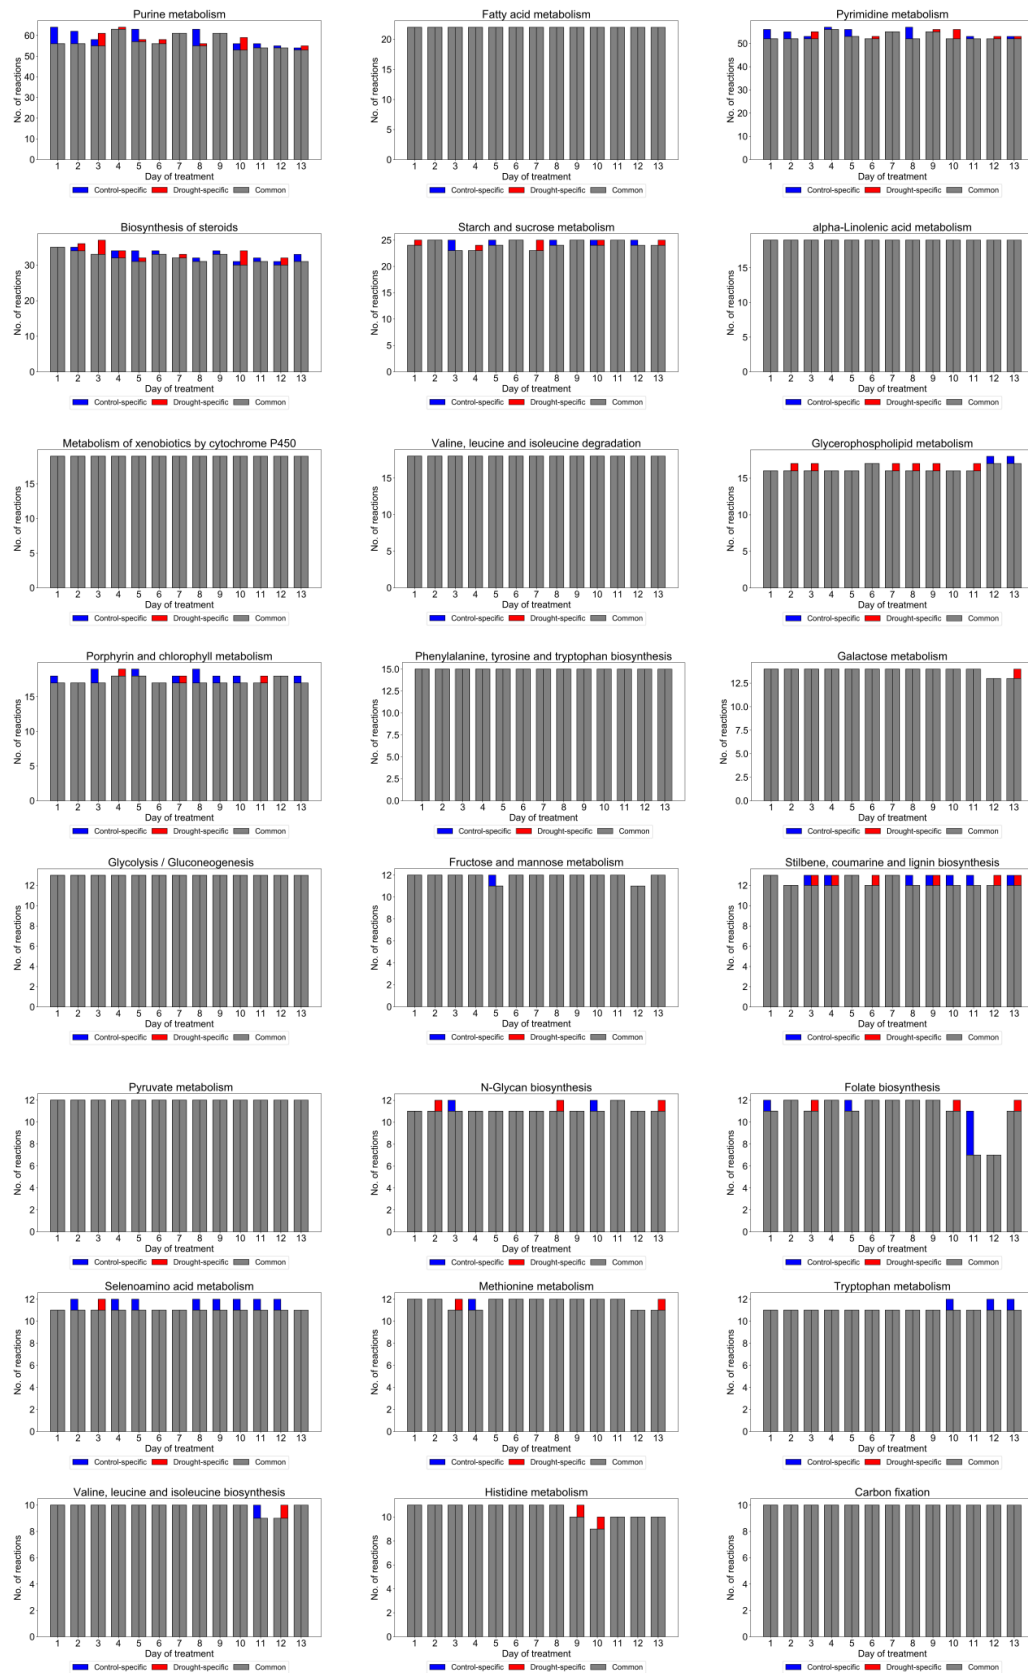

**Figure S2.** The number of reactions in respective subsystems in each GEM. Only the subsystems which contain more than 10 reactions are shown. The left and right bars in a day represent the number in control- and drought-GEMs, respectively. The control-specific, drought-specific, and common reactions are displayed in blue, red, and grey, respectively.

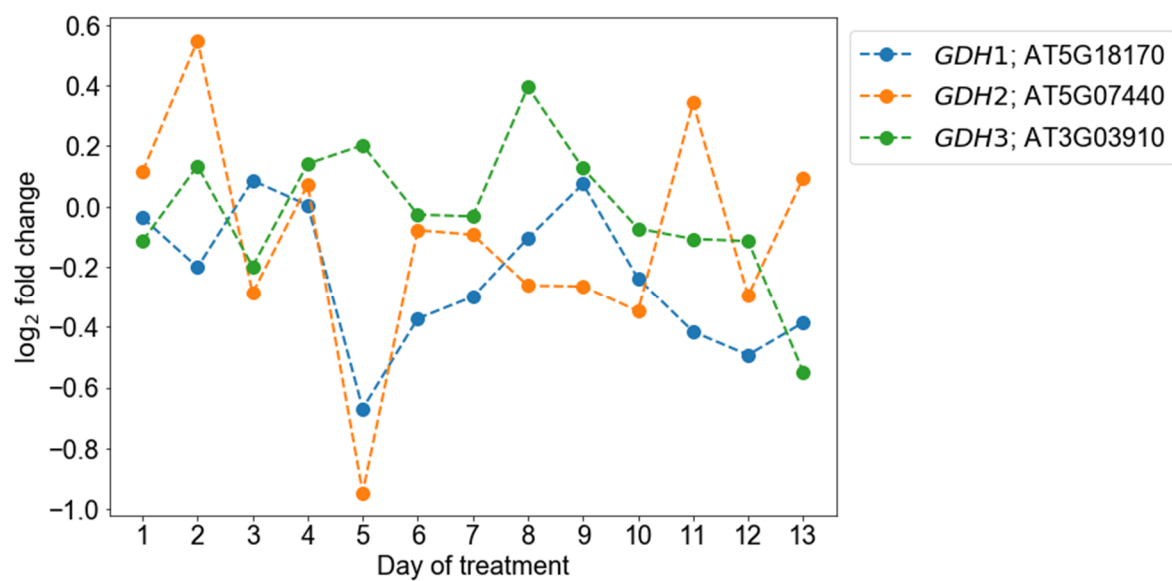

**Figure S3.** Changes in glutamate dehydrogenase gene expression under drought stress in Arabidopsis. Log<sub>2</sub> fold change of average gene expression levels of glutamate dehydrogenase genes *GDH1*, *GDH2* and *GDH3* are shown. The data was retrieved from Bechtold et al (2016) [16].

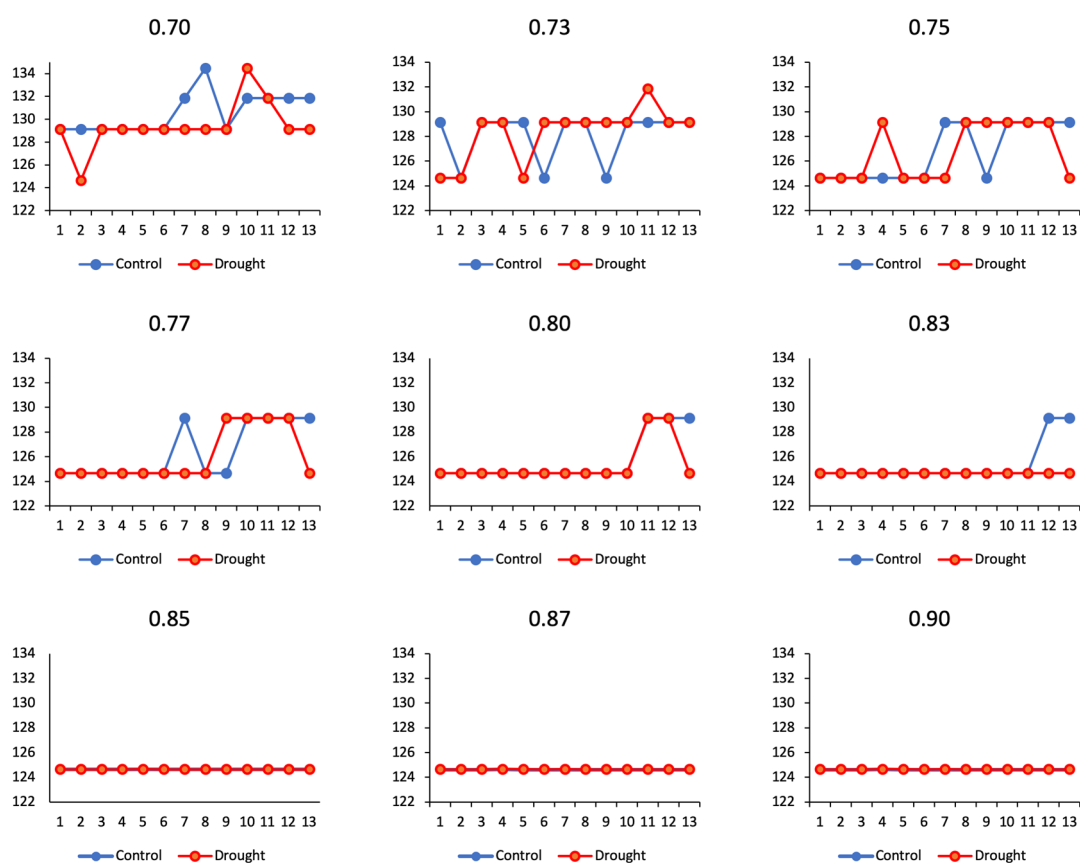

**Figure S4.** Effect of threshold setting on the time-dependent pattern of biomass production rate of 26 context-specific GEMs.
