# Supplementary material for: Drought Stress Responses in Context-Specific Genome-Scale Metabolic Models of Arabidopsis thaliana
Source: MDPI journal article supplement (doi:10.3390/metabo10040159), 2020-04-18
Supplement: s1 [file s1]

## Supplementary data 2

Biomass production reactions in the 26 context-specific GEMs.

| Coefficient | Metabolites                |
|-------------|----------------------------|
| -0.04       | 4-Coumaryl alcohol_biomass |
| 30          | ADP_c                      |
| -0.0029     | ATP_biomass                |
| -30         | ATP_c                      |
| -0.0033     | CTP_biomass                |
| -0.305      | Cellulose_biomass          |
| -0.048      | Coniferyl alcohol_biomass  |
| -0.282      | D-Xylose_biomass           |
| -0.0039     | GTP_biomass                |
| -0.053      | Glucose_biomass            |
| -0.14       | Glycine_biomass            |
| -0.026      | Hexadecanoic acid_biomass  |
| -0.107      | L-Alanine_biomass          |
| -0.39       | L-Asparagine_biomass       |
| -0.162      | L-Aspartate_biomass        |
| -0.024      | L-Cysteine_biomass         |
| -0.39       | L-Glutamate_biomass        |
| -0.35       | L-Glutamine_biomass        |
| -0.06       | L-Isoleucine_biomass       |
| -0.14       | L-Leucine_biomass          |
| -0.001      | L-Lysine_biomass           |
| -0.002      | L-Methionine_biomass       |
| -0.08       | L-Phenylalanine_biomass    |
| -0.01       | L-Proline_biomass          |
| -0.21       | L-Serine_biomass           |
| -0.086      | L-Threonine_biomass        |
| -0.04       | L-Tryptophan_biomass       |
| -0.03       | L-Tyrosine_biomass         |
| -0.1        | L-Valine_biomass           |
| 30          | Orthophosphate_c           |
| -0.056      | Sinapyl alcohol biomass    |
| -0.265      | Starch biomass             |
| -0.096      | Sucrose biomass            |
| -0.0029     | UTP_biomass                |
| -0.053      | beta-D-Fructose_biomass    |
| -0.0027     | dATP_biomass               |
| -0.0019     | dCTP_biomass               |
| -0.0017     | dGTP_biomass               |
| -0.0028     | dTTP_biomass               |
